# Supplementary material for: GWAS of Follicular Lymphoma Reveals Allelic Heterogeneity at 6p21.32 and Suggests Shared Genetic Susceptibility with Diffuse Large B-cell Lymphoma
Source: PubMed Central journal article supplement (PMC3080853; doi:10.1371/journal.pgen.1001378), 2011-04-21
Supplement: pgen.1001378.s001.pdf [file pgen.1001378.s001.pdf]

**Figure S1.** Forest plots of main associations with risk of follicular lymphoma (FL) and diffuse large B-cell lymphoma (DLBCL)

**A**

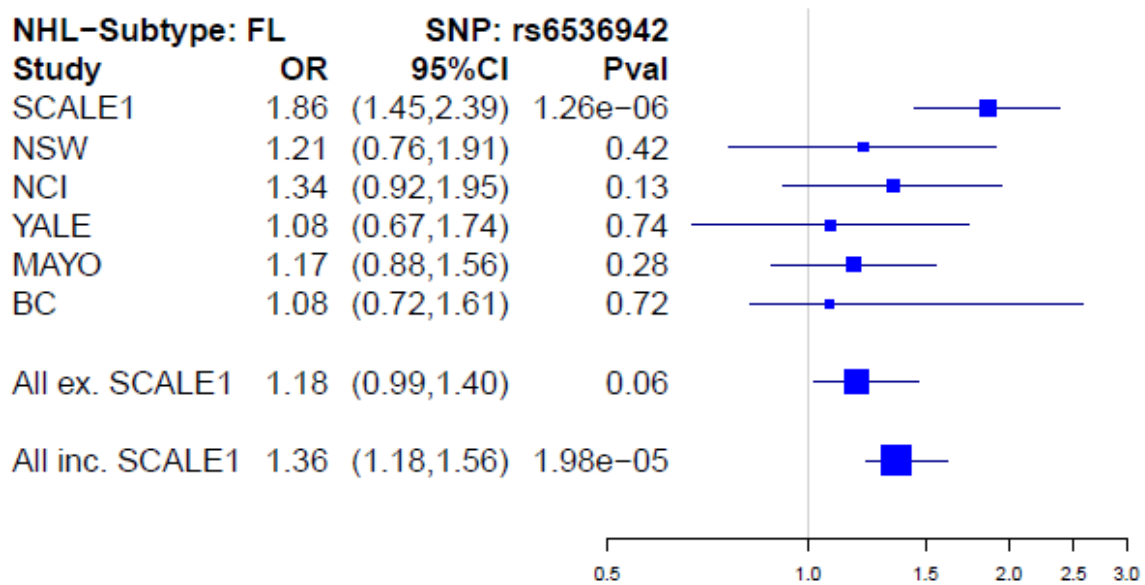

$P_{\text{heterogeneity}} = 0.09$

**B**

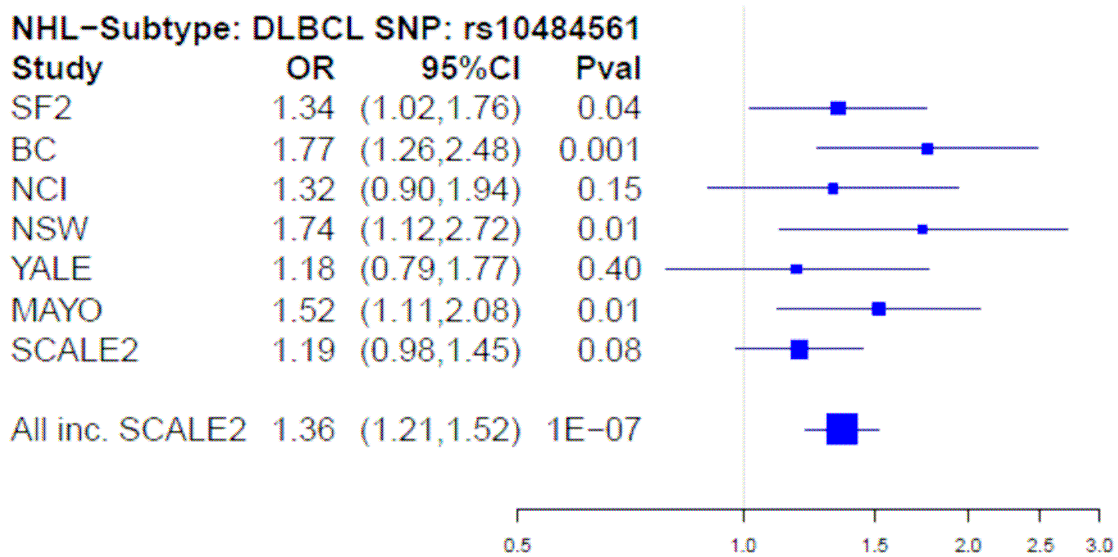

$P_{\text{heterogeneity}} = 0.28$

Abbreviations: SNP: single nucleotide polymorphism, OR: odds ratio, CI: confidence interval, SCALE: Scandinavian lymphoma etiology, SF: San Francisco, BC: British Columbia, NCI: National Cancer Institute-Surveillance, Epidemiology and End Results, NSW: New South Wales, YALE: Yale University, MAYO: Mayo Clinic.
