# Supplementary material for: GWAS of Follicular Lymphoma Reveals Allelic Heterogeneity at 6p21.32 and Suggests Shared Genetic Susceptibility with Diffuse Large B-cell Lymphoma
Source: PubMed Central journal article supplement (PMC3080853; doi:10.1371/journal.pgen.1001378), 2011-04-21

**Figure S2.** Association results (trend test on Stage 1, follicular lymphoma) for imputed single nucleotide polymorphism (SNPs) (black) and genotyped SNPs (red). rs9378212 is the top SNP among those showing high (>95%) concordance between HapMap and 1000 Genomes CEU genotypes.

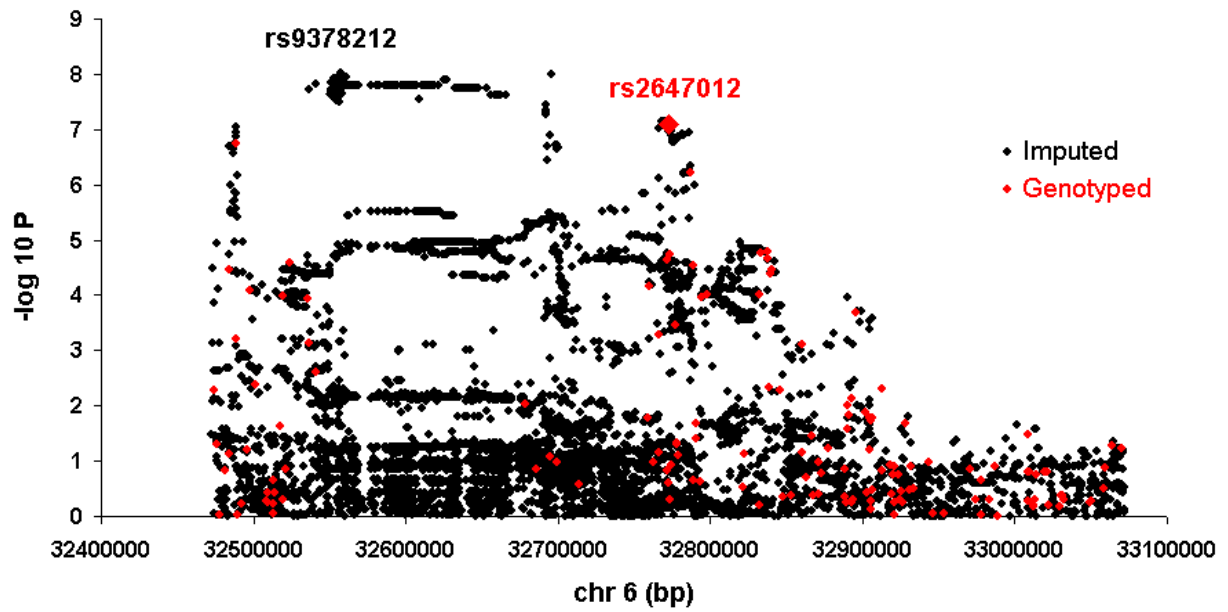

Supplement: pgen.1001378.s002.pdf [file pgen.1001378.s002.pdf]
