# Supplementary material for: GWAS of Follicular Lymphoma Reveals Allelic Heterogeneity at 6p21.32 and Suggests Shared Genetic Susceptibility with Diffuse Large B-cell Lymphoma
Source: PubMed Central journal article supplement (PMC3080853; doi:10.1371/journal.pgen.1001378), 2011-04-21

**Figure S5.** Principal components analysis (PCA) scree plot

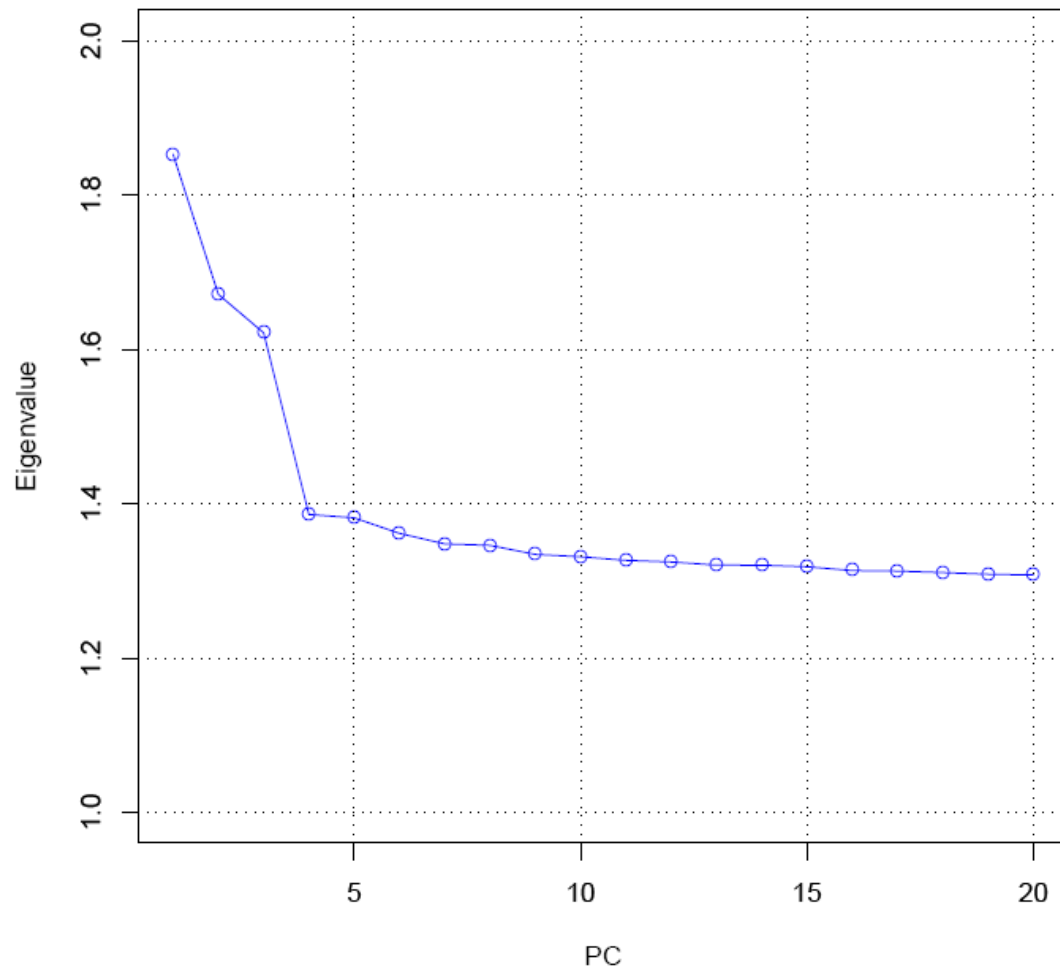

Supplement: pgen.1001378.s005.pdf [file pgen.1001378.s005.pdf]
