# Supplementary material for: GWAS of Follicular Lymphoma Reveals Allelic Heterogeneity at 6p21.32 and Suggests Shared Genetic Susceptibility with Diffuse Large B-cell Lymphoma
Source: PubMed Central journal article supplement (PMC3080853; doi:10.1371/journal.pgen.1001378), 2011-04-21
Supplement: pgen.1001378.s007.pdf [file pgen.1001378.s007.pdf]

**Table S1.** Number of patients with Non-Hodgkin lymphoma (NHL) subtypes other than follicular lymphoma (FL).

| Stage        | Study    | DLBCL <sup>a</sup> | CLL/SLL <sup>b</sup> | Marginal zone lymphoma | Mantle cell lymphoma | T-cell lymphoma | Other rare or unspec NHL <sup>c</sup> |
|--------------|----------|--------------------|----------------------|------------------------|----------------------|-----------------|---------------------------------------|
| 3            | NCI-SEER | 160                | 66                   | 51                     | 24                   | 37              | 130                                   |
|              | NSW      | 124                | 15                   | 40                     | 16                   | 9               | 57                                    |
|              | Yale     | 125                | 38                   | 28                     | 10                   | 27              | 72                                    |
|              | BC       | 163                | 37                   | 68                     | 43                   | 50              | 90                                    |
|              | Mayo     | 193                | 327                  | 61                     | 53                   | 34              | 175                                   |
|              | SCALE2   | 570                | 592                  | 88                     | 116                  | 149             | 354                                   |
|              | SF2      | 257                |                      |                        |                      |                 |                                       |
| <b>Total</b> |          | <b>1592</b>        | <b>1075</b>          | <b>336</b>             | <b>262</b>           | <b>306</b>      | <b>878</b>                            |

<sup>a</sup> Diffuse large B-cell lymphoma (DLBCL)

<sup>b</sup> Chronic lymphocytic leukemia/small lymphocytic lymphoma (CLL/SLL)

<sup>c</sup> Includes samples of patients with rare NHL subtypes such as lymphoplasmacytic lymphoma, hairy cell leukemia and prolymphocytic leukemia, unspecified B-cell NHL and unspecified NHL

Abbreviations: SCALE: Scandinavian lymphoma etiology, SF: San Francisco, NCI-SEER: National Cancer Institute, NSW: New South Wales, Yale: Yale University, BC: British Columbia, Mayo: Mayo Clinic.
