# Supplementary material for: GWAS of Follicular Lymphoma Reveals Allelic Heterogeneity at 6p21.32 and Suggests Shared Genetic Susceptibility with Diffuse Large B-cell Lymphoma
Source: PubMed Central journal article supplement (PMC3080853; doi:10.1371/journal.pgen.1001378), 2011-04-21
Supplement: pgen.1001378.s009.pdf [file pgen.1001378.s009.pdf]

**Table S3.** Top 40 SNPs taken forward to Stage 2, sorted by significance level (trend *P*-value) of association with risk of follicular lymphoma.

| Chromosomal location | SNP      | Gene <sup>a</sup> | Position  | Minor /major allele | MAF controls | HWE   | Per allele trend <i>P</i> -value <sup>b</sup> | PCA adjusted trend <i>P</i> -value <sup>b</sup> | PCA adjusted OR (95% CI) <sup>b</sup> |
|----------------------|----------|-------------------|-----------|---------------------|--------------|-------|-----------------------------------------------|-------------------------------------------------|---------------------------------------|
| rs2647012            | 6p21.32  | <i>HLA-DQB1</i>   | 32772436  | A/G                 | 0.44         | 0.71  | 1.10E-07                                      | 1.59E-07                                        | 0.58 (0.47,0.71)                      |
| rs6932542            | 6p21.32  | <i>BTNL2</i>      | 32488240  | A/G                 | 0.50         | 0.48  | 2.33E-07                                      | 3.43E-07                                        | 0.61 (0.50,0.73)                      |
| rs9275572            | 6p21.32  | <i>HLA-DQA2</i>   | 32786977  | A/G                 | 0.48         | 0.81  | 7.30E-07                                      | 8.43E-07                                        | 0.61 (0.50,0.74)                      |
| rs6536942            | 4q32.3   | <i>TLL1</i>       | 167205644 | G/A                 | 0.12         | 0.18  | 1.14E-06                                      | 4.23E-06                                        | 1.81 (1.41,2.33)                      |
| rs716183             | 10q25.3  | <i>VAX1</i>       | 118894485 | C/T                 | 0.36         | 0.20  | 1.59E-06                                      | 3.31E-06                                        | 1.52 (1.27,1.82)                      |
| rs504985             | 6q25.1   | <i>TAB2</i>       | 149700671 | G/T                 | 0.36         | 0.76  | 3.80E-06                                      | 2.17E-05                                        | 1.48 (1.24,1.78)                      |
| rs11819305           | 10q25.3  | <i>VAX1</i>       | 118898040 | A/G                 | 0.31         | 0.02  | 1.03E-05                                      | 1.97E-05                                        | 1.48 (1.23,1.76)                      |
| rs1912822            | 4q32.3   | <i>MARCH1</i>     | 164744059 | A/G                 | 0.34         | 0.57  | 1.03E-05                                      | 1.44E-05                                        | 1.50 (1.25,1.80)                      |
| rs1860373            | 17q23.2  | <i>BCAS3</i>      | 56643678  | C/T                 | 0.16         | 0.77  | 1.16E-05                                      | 3.14E-05                                        | 1.60 (1.28,1.99)                      |
| rs2868145            | 19q13.3  | <i>PDCD5</i>      | 37738954  | G/A                 | 0.14         | 0.67  | 1.24E-05                                      | 3.20E-05                                        | 1.63 (1.29,2.05)                      |
| rs2179367            | 6q25.1   | <i>ZC3H12D</i>    | 149804230 | C/T                 | 0.37         | 1.00  | 1.37E-05                                      | 7.10E-05                                        | 1.44 (1.20,1.72)                      |
| rs7453920            | 6p21.32  | <i>HLA-DQB2</i>   | 32837990  | A/G                 | 0.50         | 0.005 | 1.83E-05                                      | 5.31E-05                                        | 0.67 (0.56,0.82)                      |
| rs2301271            | 6p21.32  | <i>HLA-DQB2</i>   | 32833171  | T/C                 | 0.50         | 0.004 | 1.91E-05                                      | 5.59E-05                                        | 0.67 (0.56,0.82)                      |
| rs3817973            | 6p21.32  | <i>BTNL2</i>      | 32469089  | A/G                 | 0.42         | 0.48  | 1.94E-05                                      | 5.41E-05                                        | 1.48 (1.22,1.79)                      |
| rs9498061            | 6q24.3   | <i>SASH1</i>      | 148900981 | G/A                 | 0.23         | 0.53  | 2.04E-05                                      | 2.11E-05                                        | 0.60 (0.47,0.76)                      |
| rs4424066            | 6p21.32  | <i>BTNL2</i>      | 32462406  | G/A                 | 0.42         | 0.48  | 2.21E-05                                      | 6.04E-05                                        | 1.48 (1.22,1.78)                      |
| rs2457058            | 1p33     | -                 | 47875279  | C/T                 | 0.27         | 0.58  | 2.31E-05                                      | 3.39E-05                                        | 1.50 (1.24,1.82)                      |
| rs10484561           | 6p21.32  | <i>HLA-DQB1</i>   | 32773398  | G/T                 | 0.11         | 0.20  | 2.33E-05                                      | 5.77E-05                                        | 1.67 (1.30,2.14)                      |
| rs2051549            | 6p21.32  | <i>HLA-DQB2</i>   | 32838064  | C/T                 | 0.50         | 0.007 | 2.42E-05                                      | 6.92E-05                                        | 0.68 (0.56,0.82)                      |
| rs6457617            | 6p21.32  | <i>HLA-DQB1</i>   | 32771829  | C/T                 | 0.51         | 0.95  | 2.64E-05                                      | 2.94E-05                                        | 0.66 (0.55,0.80)                      |
| rs13209234           | 6p21.32  | <i>HLA-DRA</i>    | 32523953  | A/G                 | 0.14         | 0.75  | 3.10E-05                                      | 4.14E-05                                        | 1.64 (1.29,2.07)                      |
| rs881633             | 16q24.3  | <i>CTU2</i>       | 87301239  | A/G                 | 0.08         | 0.51  | 3.13E-05                                      | 2.10E-05                                        | 1.85 (1.39,2.46)                      |
| rs4447756            | 3p14.2   | <i>PTPRG</i>      | 61939996  | C/A                 | 0.44         | 0.55  | 3.23E-05                                      | 1.42E-05                                        | 0.66 (0.55,0.80)                      |
| rs2076530            | 6p21.32  | <i>BTNL2</i>      | 32471794  | G/A                 | 0.43         | 0.56  | 3.28E-05                                      | 7.74E-05                                        | 1.47 (1.21,1.77)                      |
| rs2858331            | 6p21.32  | <i>HLA-DQA2</i>   | 32789255  | C/T                 | 0.30         | 0.14  | 3.30E-05                                      | 1.09E-04                                        | 1.46 (1.21,1.78)                      |
| rs934320             | 10q26.12 | <i>WDR11</i>      | 122694003 | T/C                 | 0.47         | 0.51  | 3.34E-05                                      | 4.85E-05                                        | 0.69 (0.58,0.82)                      |
| rs6477205            | 9p24.1   | -                 | 7506770   | T/G                 | 0.35         | 0.42  | 3.67E-05                                      | 1.12E-04                                        | 1.44 (1.2,1.72)                       |

|            |         |                 |           |     |      |       |          |          |                  |
|------------|---------|-----------------|-----------|-----|------|-------|----------|----------|------------------|
| rs1015735  | 18q12.3 | -               | 39877321  | C/T | 0.26 | 0.56  | 3.84E-05 | 9.68E-05 | 1.48 (1.21,1.80) |
| rs4340393  | 18q12.3 | -               | 39884052  | T/C | 0.25 | 0.56  | 4.03E-05 | 9.05E-05 | 1.48 (1.22,1.80) |
| rs1386706  | 13q31.1 | -               | 82314548  | A/G | 0.04 | 0.13  | 4.06E-05 | 3.13E-05 | 2.17 (1.51,3.13) |
| rs1386706  | 13q31.1 | -               | 82299724  | G/A | 0.04 | 0.002 | 4.06E-05 | 3.13E-05 | 2.17 (1.51,3.13) |
| rs6029356  | 20q12   | -               | 38882719  | A/G | 0.15 | 0.69  | 4.18E-05 | 3.15E-05 | 0.53 (0.39,0.71) |
| rs9498335  | 6q25.1  | <i>TAB2</i>     | 149735477 | A/C | 0.26 | 0.61  | 4.18E-05 | 1.23E-04 | 1.47 (1.21,1.78) |
| rs10214840 | 6q25.1  | <i>TAB2</i>     | 149685402 | C/T | 0.26 | 0.66  | 4.35E-05 | 1.27E-04 | 1.46 (1.21,1.78) |
| rs7613835  | 3q26.31 | <i>NAALADL2</i> | 176632062 | G/A | 0.26 | 0.93  | 4.40E-05 | 2.77E-05 | 0.63 (0.50,0.78) |
| rs9277554  | 6p21.32 | <i>HLA-DPBI</i> | 33163516  | T/C | 0.28 | 0.08  | 4.53E-05 | 1.12E-04 | 0.66 (0.54,0.82) |
| rs6793266  | 3q26.31 | <i>NAALADL2</i> | 176585032 | T/C | 0.43 | 0.27  | 6.30E-05 | 1.23E-04 | 0.70 (0.58,0.84) |
| rs4891489  | 18q22.3 | <i>NETO1</i>    | 68662302  | A/G | 0.40 | 0.12  | 6.59E-05 | 2.43E-04 | 0.71 (0.59,0.85) |
| rs441890   | 8q13.3  | <i>LACTB2</i>   | 71727221  | G/A | 0.40 | 0.11  | 6.80E-05 | 1.19E-04 | 1.41 (1.18,1.68) |
| rs1552126  | 14q32.2 | -               | 97063843  | C/T | 0.42 | 0.02  | 8.46E-05 | 1.86E-04 | 0.71 (0.60,0.85) |

<sup>a</sup> Closest gene located within 50 kb distance of the marker

<sup>b</sup> Per allele trend *P*-value, Odds ratio (OR) and 95% confidence interval (CI) adjusted for principal components analysis (PCA)

MAF: minor allele frequency, HWE: Hardy-Weinberg equilibrium
