# Supplementary material for: GWAS of Follicular Lymphoma Reveals Allelic Heterogeneity at 6p21.32 and Suggests Shared Genetic Susceptibility with Diffuse Large B-cell Lymphoma
Source: PubMed Central journal article supplement (PMC3080853; doi:10.1371/journal.pgen.1001378), 2011-04-21
Supplement: pgen.1001378.s010.pdf [file pgen.1001378.s010.pdf]

**Table S4.** SNPs on chromosome 6p21.32 that showed genome-wide per allele  $P$ -values  $< 10^{-4}$  in association with risk of follicular lymphoma in Stage 1, sorted by position.

| Chromosomal location | SNP     | Gene <sup>a</sup> | Position | MAF controls | HWE controls | Per allele trend $P$ -value | PCA adjusted trend $P$ -value <sup>b</sup> | PCA adjusted OR (95% CI) <sup>b</sup> |
|----------------------|---------|-------------------|----------|--------------|--------------|-----------------------------|--------------------------------------------|---------------------------------------|
| rs4424066            | 6p21.32 | BTNL2 (8)         | 32462406 | 0.42         | 0.66         | 2.21E-05                    | 6.04E-05                                   | 1.48 (1.22-1.78)                      |
| rs3817973            | 6p21.32 | BTNL2 (1.4)       | 32469089 | 0.42         | 0.72         | 1.94E-05                    | 5.41E-05                                   | 1.48 (1.22-1.79)                      |
| rs2076530            | 6p21.32 | BTNL2 (missense)  | 32471794 | 0.43         | 0.72         | 3.28E-05                    | 7.74E-05                                   | 1.47 (1.21-1.77)                      |
| rs3763313            | 6p21.32 | BTNL2 (-1.5)      | 32484449 | 0.19         | 0.17         | 4.00E-05                    | 7.30E-05                                   | 1.55 (1.25-1.92)                      |
| rs6932542            | 6p21.32 | BTNL2 (-5)        | 32488240 | 0.50         | 0.39         | 2.33E-07                    | 3.43E-07                                   | 0.61 (0.50-0.73)                      |
| rs3135363            | 6p21.32 | HLA-DRA (-15)     | 32497626 | 0.30         | 0.18         | 9.10E-05                    | 7.94E-05                                   | 0.62 (0.49-0.79)                      |
| rs13209234           | 6p21.32 | HLA-DRA (3)       | 32523953 | 0.14         | 0.31         | 3.10E-05                    | 4.14E-05                                   | 1.64 (1.29-2.07)                      |
| rs7755224            | 6p21.32 | HLA-DQB1 (-17)    | 32760295 | 0.11         | 0.86         | 8.11E-05                    | 1.39E-04                                   | 1.63 (1.27-2.10)                      |
| rs6457617            | 6p21.32 | HLA-DQB1 (-29)    | 32771829 | 0.51         | 0.57         | 2.64E-05                    | 2.94E-05                                   | 0.66 (0.55-0.80)                      |
| rs2647012            | 6p21.32 | HLA-DQB1(-29)     | 32772436 | 0.44         | 0.47         | 1.10E-07                    | 1.59E-07                                   | 0.58 (0.47-0.71)                      |
| rs10484561           | 6p21.32 | HLA-DQB1 (-30)    | 32773398 | 0.11         | 0.86         | 2.33E-05                    | 5.77E-05                                   | 1.67 (1.30-2.14)                      |
| rs9275572            | 6p21.32 | HLA-DQA2 (-30)    | 32786977 | 0.48         | 1.00         | 7.30E-07                    | 8.43E-07                                   | 0.61 (0.50-0.74)                      |
| rs2858331            | 6p21.32 | HLA-DQA2 (-27)    | 32789255 | 0.30         | 0.21         | 3.30E-05                    | 1.09E-04                                   | 1.46 (1.21-1.78)                      |
| rs2301271            | 6p21.32 | HLA-DQB2 (intron) | 32833171 | 0.50         | 0.01         | 1.91E-05                    | 5.59E-05                                   | 0.67 (0.56-0.82)                      |
| rs7453920            | 6p21.32 | HLA-DQB2 (intron) | 32837990 | 0.50         | 0.01         | 1.83E-05                    | 5.31E-05                                   | 0.67 (0.56-0.82)                      |
| rs2051549            | 6p21.32 | HLA-DQB2 (intron) | 32838064 | 0.50         | 0.01         | 2.42E-05                    | 6.92E-05                                   | 0.68 (0.56-0.82)                      |
| rs1573649            | 6p21.32 | HLA-DQB2 (5' UTR) | 32839236 | 0.43         | 0.04         | 4.46E-05                    | 9.09E-05                                   | 1.46 (1.21-1.76)                      |
| rs6903130            | 6p21.32 | HLA-DQB2 (-0.8)   | 32840188 | 0.43         | 0.03         | 3.93E-05                    | 6.65E-05                                   | 1.48 (1.22-1.79)                      |
| rs9277554            | 6p21.32 | HLA-DPB1(0.6)     | 33163516 | 0.28         | 0.10         | 4.53E-05                    | 1.12E-04                                   | 0.66 (0.54-0.82)                      |

<sup>a</sup> Closest gene located within 50 kb of the marker, shown with distance of SNP upstream (-) or downstream (+) of gene.

<sup>b</sup> Per allele trend  $P$ -value, Odds ratio (OR) and 95% confidence interval (CI) adjusted for principal components analysis (PCA)

MAF: minor allele frequency, HWE: Hardy-Weinberg equilibrium
