# Supplementary material for: GWAS of Follicular Lymphoma Reveals Allelic Heterogeneity at 6p21.32 and Suggests Shared Genetic Susceptibility with Diffuse Large B-cell Lymphoma
Source: PubMed Central journal article supplement (PMC3080853; doi:10.1371/journal.pgen.1001378), 2011-04-21
Supplement: pgen.1001378.s011.pdf [file pgen.1001378.s011.pdf]

**Table S5.** Summary statistics for associations<sup>a</sup> with risk of follicular lymphoma in Stages 1 and 2 with combined *P*-values. SNPs in bold were taken forward to Stage 3. The closest gene within 50Kb is shown.

| Chromosomal location | SNP            | Gene            | Position         | Minor/major allele | SCALE1       |                         |                 | SF           |                         |                             | Combined                |                 |
|----------------------|----------------|-----------------|------------------|--------------------|--------------|-------------------------|-----------------|--------------|-------------------------|-----------------------------|-------------------------|-----------------|
|                      |                |                 |                  |                    | MAF Controls | OR(95% CI)              | P-value         | MAF Controls | OR (95% CI)             | P-value                     | OR (95% CI)             | P-value         |
| <b>rs2647012</b>     | <b>6p21.32</b> | <b>HLA-DQB1</b> | <b>32772436</b>  | <b>A/G</b>         | <b>0.44</b>  | <b>0.61 (0.51-0.73)</b> | <b>1.10E-07</b> | <b>0.36</b>  | <b>0.64 (0.47-0.86)</b> | <b>4.77E-03<sup>b</sup></b> | <b>0.62 (0.53-0.72)</b> | <b>1.64E-09</b> |
| rs6932542            | 6p21.32        | <i>BTNL2</i>    | 32488240         | A/G                | 0.5          | 0.63 (0.53-0.75)        | 2.33E-07        | 0.48         | 0.64 (0.46-0.88)        | 1.70E-02 <sup>b</sup>       | 0.63 (0.54-0.74)        | 5.30E-09        |
| rs9275572            | 6p21.32        | <i>HLA-DQA2</i> | 32786977         | A/G                | 0.48         | 0.64 (0.53-0.76)        | 7.30E-07        | 0.39         | 0.59 (0.44-0.81)        | 5.52E-04 <sup>b</sup>       | 0.62 (0.54-0.73)        | 2.09E-09        |
| <b>rs6536942</b>     | <b>4q32.3</b>  | <b>TLL1</b>     | <b>167205644</b> | <b>G/A</b>         | <b>0.12</b>  | <b>1.80 (1.42-2.29)</b> | <b>1.14E-06</b> | -            | -                       | -                           | -                       | -               |
| <b>rs716183</b>      | <b>10q25.3</b> | <b>VAX1</b>     | <b>118894485</b> | <b>C/T</b>         | <b>0.36</b>  | <b>1.56 (1.30-1.86)</b> | <b>1.59E-06</b> | <b>0.42</b>  | <b>1.16 (0.84-1.62)</b> | <b>0.42</b>                 | <b>1.46 (1.25-1.70)</b> | <b>1.88E-06</b> |
| rs504985             | 6q25.1         | <i>TAB2</i>     | 149700671        | G/T                | 0.36         | 1.52 (1.27-1.81)        | 3.80E-06        | 0.4          | 1.12 (0.81-1.56)        | 0.47                        | 1.42 (1.21-1.65)        | 1.10E-05        |
| rs11819305           | 10q25.3        | <i>VAX1</i>     | 118898040        | A/G                | 0.31         | 1.52 (1.27-1.83)        | 1.03E-05        | 0.36         | 1.04 (0.76-1.42)        | 0.8                         | 1.38 (1.18-1.62)        | 4.68E-05        |
| rs1912822            | 4q32.3         | <i>MARCH1</i>   | 164744059        | A/G                | 0.34         | 1.49 (1.25-1.78)        | 1.03E-05        | 0.36         | 1.18 (0.86-1.62)        | 0.44                        | 1.41 (1.21-1.64)        | 1.44E-05        |
| rs1860373            | 17q23.2        | <i>BCAS3</i>    | 56643678         | C/T                | 0.16         | 1.61 (1.30-2.00)        | 1.16E-05        | 0.15         | 1.00 (0.71-1.41)        | 0.94                        | 1.41 (1.18-1.69)        | 2.00E-04        |
| rs2868145            | 19q13.3        | <i>PDCD5</i>    | 37738954         | G/A                | 0.14         | 1.66 (1.33-2.08)        | 1.24E-05        | 0.15         | 1.24 (0.89-1.72)        | 0.29                        | 1.51 (1.26-1.82)        | 1.21E-05        |
| rs2179367            | 6q25.1         | <i>ZC3H12D</i>  | 149804230        | C/T                | 0.37         | 1.48 (1.24-1.76)        | 1.37E-05        | 0.41         | 1.15 (0.83-1.60)        | 0.42                        | 1.40 (1.20-1.63)        | 2.24E-05        |
| rs7453920            | 6p21.32        | <i>HLA-DQB2</i> | 32837990         | A/G                | 0.5          | 0.69 (0.58-0.82)        | 1.83E-05        | 0.41         | 0.72 (0.53-0.99)        | 5.90E-02                    | 0.70 (0.60-0.81)        | 4.40E-06        |
| rs2301271            | 6p21.32        | <i>HLA-DQB2</i> | 32833171         | T/C                | 0.5          | 0.69 (0.58-0.82)        | 1.91E-05        | 0.41         | 0.72 (0.53-0.99)        | 5.50E-02                    | 0.70 (0.60-0.82)        | 4.21E-06        |
| rs3817973            | 6p21.32        | <i>BTNL2</i>    | 32469089         | A/G                | 0.42         | 1.46 (1.22-1.74)        | 1.94E-05        | 0.42         | 1.08 (0.78-1.50)        | 0.12                        | 1.36 (1.17-1.59)        | 7.30E-05        |
| rs4424066            | 6p21.32        | <i>BTNL2</i>    | 32462406         | G/A                | 0.42         | 1.46 (1.22-1.73)        | 2.21E-05        | 0.42         | 1.08 (0.78-1.51)        | 0.12                        | 1.36 (1.17-1.59)        | 7.67E-05        |
| rs10484561           | 6p21.32        | <i>HLA-DQB1</i> | 32773398         | G/T                | 0.11         | 1.72 (1.34-2.19)        | 2.33E-05        | 0.13         | 2.06 (1.48-2.85)        | 2.67E-05 <sup>b</sup>       | 1.83 (1.51-2.23)        | 1.25E-09        |
| rs2051549            | 6p21.32        | <i>HLA-DQB2</i> | 32838064         | C/T                | 0.5          | 0.70 (0.58-0.83)        | 2.42E-05        | 0.41         | 0.74 (0.54-1.02)        | 7.50E-02                    | 0.71 (0.61-0.82)        | 8.30E-06        |
| rs6457617            | 6p21.32        | <i>HLA-DQB1</i> | 32771829         | C/T                | 0.51         | 0.68 (0.58-0.82)        | 2.64E-05        | 0.49         | 0.60 (0.44-0.83)        | 1.28E-03 <sup>b</sup>       | 0.66 (0.57-0.78)        | 2.02E-07        |
| rs13209234           | 6p21.32        | <i>HLA-DRA</i>  | 32523953         | A/G                | 0.14         | 1.62 (1.29-2.03)        | 3.10E-05        | -            | -                       | -                           | -                       | -               |
| rs4447756            | 3p14.2         | <i>PTPRG</i>    | 61939996         | C/A                | 0.44         | 0.68 (0.57-0.82)        | 3.23E-05        | 0.4          | 0.94 (0.68-1.29)        | 0.55                        | 0.74 (0.63-0.86)        | 1.50E-04        |
| rs2076530            | 6p21.32        | <i>BTNL2</i>    | 32471794         | G/A                | 0.43         | 1.44 (1.21-1.72)        | 3.28E-05        | 0.42         | 1.13 (0.81-1.58)        | 9.60E-02                    | 1.37 (1.17-1.60)        | 6.68E-05        |
| rs2858331            | 6p21.32        | <i>HLA-DQA2</i> | 32789255         | C/T                | 0.3          | 1.46 (1.22-1.75)        | 3.30E-05        | 0.42         | 1.60 (1.14-2.28)        | 2.00E-04 <sup>b</sup>       | 1.49 (1.27-1.75)        | 1.27E-06        |
| rs934320             | 10q26.12       | <i>WDR11</i>    | 122694003        | T/C                | 0.47         | 0.68 (0.57-0.82)        | 3.34E-05        | 0.45         | 0.93 (0.67-1.30)        | 0.89                        | 0.73 (0.63-0.86)        | 9.43E-05        |
| rs6477205            | 9p24.1         | -               | 7506770          | T/G                | 0.35         | 1.45 (1.21-1.73)        | 3.67E-05        | 0.35         | 1.17 (0.86-1.60)        | 0.92                        | 1.38 (1.18-1.60)        | 5.13E-05        |
| rs1015735            | 18q12.3        | -               | 39877321         | C/T                | 0.26         | 1.48 (1.23-1.80)        | 3.84E-05        | 0.31         | 1.00 (0.74-1.37)        | 0.99                        | 1.34 (1.14-1.57)        | 4.50E-04        |

|                  |                |                        |                 |            |             |                         |                 |             |                         |                             |                         |                 |
|------------------|----------------|------------------------|-----------------|------------|-------------|-------------------------|-----------------|-------------|-------------------------|-----------------------------|-------------------------|-----------------|
| rs4340393        | 18q12.3        | -                      | 39884052        | T/C        | 0.25        | 1.48 (1.23-1.79)        | 4.03E-05        | 0.31        | 1.00 (0.74-1.36)        | 0.95                        | 1.33 (1.13-1.56)        | 5.10E-04        |
| rs1386706        | 13q31.1        | -                      | 82314548        | A/G        | 0.04        | 2.21 (1.53-3.19)        | 4.06E-05        | 0.06        | 1.17 (0.74-1.81)        | 0.34                        | 1.71 (1.29-2.27)        | 2.10E-04        |
| rs9498335        | 6q25.1         | <i>TAB2</i>            | 149735477       | A/C        | 0.26        | 1.48 (1.23-1.79)        | 4.18E-05        | 0.29        | 0.99 (0.73-1.34)        | 0.72                        | 1.32 (1.13-1.56)        | 5.80E-04        |
| rs10214840       | 6q25.1         | <i>TAB2</i>            | 149685402       | C/T        | 0.26        | 1.48 (1.22-1.79)        | 4.35E-05        | 0.29        | 0.99 (0.73-1.35)        | 0.71                        | 1.32 (1.13-1.56)        | 5.78E-04        |
| <b>rs9277554</b> | <b>6p21.32</b> | <b><i>HLA-DPBI</i></b> | <b>33163516</b> | <b>T/C</b> | <b>0.28</b> | <b>0.64 (0.52-0.79)</b> | <b>4.53E-05</b> | <b>0.29</b> | <b>0.76 (0.55-1.03)</b> | <b>9.79E-02</b>             | <b>0.67 (0.57-0.80)</b> | <b>7.39E-06</b> |
| <b>rs441890</b>  | <b>8q13.3</b>  | <b><i>LACTB2</i></b>   | <b>71727221</b> | <b>G/A</b> | <b>0.4</b>  | <b>1.44 (1.21-1.72)</b> | <b>6.80E-05</b> | <b>0.42</b> | <b>1.42 (1.02-2.02)</b> | <b>4.71E-03<sup>b</sup></b> | <b>1.44 (1.23-1.68)</b> | <b>4.91E-06</b> |
| rs4567602        | 13q31.1        | -                      | 8299724         | A/G        | 0.05        | 2.21 (1.52-3.19)        | 7.33E-05        | 0.06        | 1.15 (0.73-1.77)        | 0.39                        | 1.69 (1.27-2.25)        | 2.90E-04        |
| rs1552126        | 14q32.2        | -                      | 97063843        | C/T        | 0.42        | 0.69 (0.57-0.82)        | 8.46E-05        | 0.43        | 0.90 (0.65-1.24)        | 0.81                        | 0.73 (0.62-0.86)        | 1.13E-04        |

<sup>a</sup> Per allele odds ratios (OR) with 95% confidence intervals (CI) and per allele *P*-values.

<sup>b</sup> SNPs with *P*-values < 0.05 in association with risk of follicular lymphoma in Stage 2 (SF1 study).

MAF: minor allele frequency, SCALE: Scandinavian lymphoma etiology, SF: San Francisco
