# Supplementary material for: GWAS of Follicular Lymphoma Reveals Allelic Heterogeneity at 6p21.32 and Suggests Shared Genetic Susceptibility with Diffuse Large B-cell Lymphoma
Source: PubMed Central journal article supplement (PMC3080853; doi:10.1371/journal.pgen.1001378), 2011-04-21
Supplement: pgen.1001378.s012.pdf [file pgen.1001378.s012.pdf]

**Table S6.** Crude and adjusted logistic regression analyses, with odds ratios (ORs) and trend (per allele), P-values, of the six SNPs in 6p21.32 showing significant association with risk of follicular lymphoma in Stages 1 and 2, including rs10484561

| CHR | SNP        | BP       | Allele | Logistic regression, |          |                        |       |                         |          |                                          |      |
|-----|------------|----------|--------|----------------------|----------|------------------------|-------|-------------------------|----------|------------------------------------------|------|
|     |            |          |        | crude                |          | Adjusted for rs2647012 |       | Adjusted for rs10484561 |          | Adjusted for rs2647012<br>and rs10484561 |      |
|     |            |          |        | OR                   | P        | OR                     | P     | OR                      | P        | OR                                       | P    |
| 6   | rs6932542  | 32488240 | A      | 0.62                 | 2.33E-07 | 0.76                   | 0.04  | 0.66                    | 2.51E-05 | 0.79                                     | 0.09 |
| 6   | rs6457617  | 32771829 | C      | 0.68                 | 2.64E-05 | 1.09                   | 0.58  | 0.75                    | 0.003    | 1.22                                     | 0.23 |
| 6   | rs2647012  | 32772436 | T      | 0.60                 | 1.10E-07 | NA                     | NA    | 0.65                    | 1.16E-05 | NA                                       | NA   |
| 6   | rs10484561 | 32773398 | G      | 1.69                 | 2.33E-05 | 1.43                   | 0.006 | NA                      | NA       | NA                                       | NA   |
| 6   | rs9275572  | 32786977 | A      | 0.63                 | 7.30E-07 | 0.93                   | 0.72  | 0.68                    | 7.84E-05 | 1.00                                     | 0.99 |
| 6   | rs2858331  | 32789255 | G      | 1.49                 | 3.30E-05 | 1.19                   | 0.12  | 1.30                    | 0.02     | 1.03                                     | 0.84 |

CHR: chromosome, BP: base pair
