# Supplementary material for: GWAS of Follicular Lymphoma Reveals Allelic Heterogeneity at 6p21.32 and Suggests Shared Genetic Susceptibility with Diffuse Large B-cell Lymphoma
Source: PubMed Central journal article supplement (PMC3080853; doi:10.1371/journal.pgen.1001378), 2011-04-21
Supplement: pgen.1001378.s013.pdf [file pgen.1001378.s013.pdf]

**Table S7.** Individual study results for associations between the 5 SNPs taken forward to Stage 3 and risk of follicular lymphoma in Stage 3.

| SNP                                           | BC                   |          | NCI-SEER             |         | NSW                  |          | YALE                 |          | Mayo                 |          | Joint               |          |
|-----------------------------------------------|----------------------|----------|----------------------|---------|----------------------|----------|----------------------|----------|----------------------|----------|---------------------|----------|
|                                               | OR (95%CI)           | P-value  | OR (95%CI)           | P-value | OR (95%CI)           | P-value  | OR (95%CI)           | P-value  | OR (95%CI)           | P-value  | OR (95%CI)          | P-value  |
| rs2647012                                     |                      |          |                      |         |                      |          |                      |          |                      |          |                     |          |
| chr6:32772436<br><i>HLA-DQB1</i><br>rs6536942 | 0.69<br>(0.53-0.89)  | 3.84E-03 | 0.81<br>(0.61- 1.06) | 0.12    | 0.53<br>(0.38- 0.73) | 1.37E-04 | 0.63<br>(0.45- 0.89) | 8.58E-03 | 0.56<br>(0.45-0.69)  | 1.15E-07 | 0.65<br>(0.58-0.72) | 2.69E-15 |
| chr4:167205644<br><i>TLL1</i><br>rs9275574    | 1.08<br>(0.72- 1.61) | 0.72     | 1.34<br>(0.92-1.95)  | 0.13    | 1.21<br>(0.76-1.91)  | 0.42     | 1.08<br>(0.67-1.75)  | 0.74     | 1.17<br>(0.88-1.56)  | 0.28     | 1.18<br>(0.99-1.40) | 0.06     |
| chr6:33163516<br><i>HLA-DPB1</i><br>rs441890  | 1.05<br>(0.89-1.36)  | 0.72     | 1.02<br>(0.78-1.33)  | 0.91    | 0.79<br>(0.57-1.10)  | 0.17     | 0.84<br>(0.59-1.19)  | 0.33     | 0.91<br>(0.73-1.13)  | 0.39     | 0.91<br>(0.81-1.01) | 0.08     |
| chr8:71727221<br><i>LACTB2</i><br>rs716183    | 1.12<br>(0.88- 1.43) | 0.35     | 1.22<br>(0.93-1.59)  | 0.14    | 1.06<br>(0.78-1.43)  | 0.71     | 1.00<br>(0.73-1.38)  | 0.97     | 0.83<br>(0.68-1.01)  | 0.06     | 1.01<br>(0.90-1.13) | 0.91     |
| chr10:118894485<br><i>VAX1</i>                | 0.87<br>(0.69-1.11)  | 0.28     | 0.99<br>(0.77-1.27)  | 0.95    | 1.34<br>(1.01-1.79)  | 0.04     | 1.03<br>(0.75- 1.41) | 0.85     | 0.91<br>(0.74- 1.11) | 0.34     | 0.99<br>(0.88-1.10) | 0.84     |

SCALE: Scandinavian lymphoma etiology, SF: San Francisco, BC: British Columbia, NCI-SEER: National Cancer Institute-Surveillance, Epidemiology and End Results, NSW: New South Wales, Yale: Yale University, Mayo: Mayo Clinic, OR: odds ratio, CI: confidence interval
