# Supplementary material for: GWAS of Follicular Lymphoma Reveals Allelic Heterogeneity at 6p21.32 and Suggests Shared Genetic Susceptibility with Diffuse Large B-cell Lymphoma
Source: PubMed Central journal article supplement (PMC3080853; doi:10.1371/journal.pgen.1001378), 2011-04-21
Supplement: pgen.1001378.s014.pdf [file pgen.1001378.s014.pdf]

**Table S8.** Genotype counts of main single nucleotide polymorphisms (SNPs) per Cases/Controls (Ca/Co); per study and in total.

| NHL subtype | SNP               | Allele | SCALE1  | SF      | BC      | NCI-SEER | NSW    | Mayo     | Yale   | Total    |
|-------------|-------------------|--------|---------|---------|---------|----------|--------|----------|--------|----------|
|             |                   |        | Ca/Co   | Ca/Co   | Ca/Co   | Ca/Co    | Ca/Co  | Ca/Co    | Ca/Co  | Ca/Co    |
| FL          | <b>rs2647012</b>  | GG     | 173/245 | 110/304 | 83/225  | 79/196   | 67/100 | 116/403  | 55/182 | 683/1655 |
|             | chr6:32772436     | GA     | 166/399 | 81/342  | 72/271  | 52/222   | 48/155 | 111/605  | 32/209 | 562/2203 |
|             | <i>HLA-DQB1</i>   | AA     | 38/145  | 20/97   | 16/97   | 21/61    | 11/50  | 17/224   | 10/64  | 133/738  |
| FL          | <b>rs6536942</b>  | AA     | 231/605 | -       | 138/489 | 114/381  | 96/250 | 187/980  | 78/363 | 844/3068 |
|             | chr4:167205644    | AG     | 121/166 | -       | 34/112  | 33/92    | 30/49  | 55/233   | 17/90  | 290/742  |
|             | <i>TLL1</i>       | GG     | 9/8     | -       | 1/3     | 5/6      | 0/6    | 4/20     | 3/5    | 22/48    |
| FL          | <b>rs9277554</b>  | CC     | 241/414 | 124/381 | 88/315  | 80/254   | 65/135 | 137/635  | 55/232 | 790/2366 |
|             | chr6:33163516     | CT     | 121/302 | 73/297  | 70/225  | 55/173   | 51/139 | 86/490   | 36/189 | 492/1815 |
|             | <i>HLA-DPB1</i>   | TT     | 16/73   | 16/65   | 15/53   | 17/52    | 10/31  | 21/100   | 7/39   | 102/413  |
| FL          | <b>rs441890</b>   | AA     | 108/289 | 56/252  | 52/215  | 48/183   | 41/108 | 96/413   | 31/158 | 376/1366 |
|             | chr8:71727221     | AG     | 168/374 | 103/365 | 93/283  | 78/227   | 65/148 | 115/595  | 51/221 | 570/1851 |
|             | <i>LACTB2</i>     | GG     | 98/126  | 54/130  | 28/99   | 26/69    | 20/49  | 35/221   | 15/81  | 222/645  |
| FL          | <b>rs716183</b>   | TT     | 115/328 | 67/261  | 63/201  | 53/159   | 41/101 | 84/389   | 28/146 | 384/1324 |
|             | chr10:118894485   | TC     | 175/360 | 105/352 | 82/285  | 65/219   | 45/153 | 122/618  | 53/224 | 542/1859 |
|             | <i>VAX1</i>       | CC     | 88/103  | 41/137  | 27/115  | 34/101   | 40/51  | 40/225   | 17/88  | 246/683  |
| DLBCL       | <b>rs10484561</b> | TT     | -       | 25/23   | 113/474 | 99/343   | 73/299 | 144/1005 | 90/352 | 944/4016 |
|             | chr6:32773398     | TG     | -       | 19/23   | 37/109  | 42/107   | 30/66  | 43/214   | 29/94  | 306/987  |
|             | <i>HLA-DQB1</i>   | GG     | -       | 8/13    | 9/6     | 2/5      | 2/4    | 6/13     | 3/9    | 36/67    |

FL: follicular lymphoma, DLBCL: diffuse large B-cell lymphoma, SCALE: Scandinavian lymphoma etiology, SF: San Francisco, BC: British Columbia, NCI-SEER: National Cancer Institute-Surveillance, Epidemiology and End Results, NSW: New South Wales, Yale: Yale University, Mayo: Mayo Clinic.
