# Supplementary material for: GWAS of Follicular Lymphoma Reveals Allelic Heterogeneity at 6p21.32 and Suggests Shared Genetic Susceptibility with Diffuse Large B-cell Lymphoma
Source: PubMed Central journal article supplement (PMC3080853; doi:10.1371/journal.pgen.1001378), 2011-04-21
Supplement: pgen.1001378.s016.pdf [file pgen.1001378.s016.pdf]

**Table S10.** Imputation of human leukocyte antigen (HLA) class II alleles and risk of follicular lymphoma (Odds ratio (OR) and trend P-value).

| Imputed HLA allele        | Frequency in SCALE GWAS samples |               | Tagging info <sup>c</sup> and Frequency in CEU[3] |                |      | Logistic regression |                    |                       |
|---------------------------|---------------------------------|---------------|---------------------------------------------------|----------------|------|---------------------|--------------------|-----------------------|
|                           | Freq cases                      | Freq controls | HLA freq                                          | r <sup>2</sup> | D'   | N                   | OR                 | P                     |
| HLA-DQA*0101              | 0.18                            | 0.13          | 0.13                                              | 1              | 1    | 1139                | 1.40               | 0.006 <sup>a</sup>    |
| HLA-DQA*0102              | 0.28                            | 0.39          | 0.24                                              | 0.88           | 0.97 |                     | Low call rate <90% |                       |
| HLA-DQA*0103              | 0.04                            | 0.09          | 0.06                                              | 0.90           | 1    |                     | Low call rate <90% |                       |
| HLA-DQB*0201              | 0.21                            | 0.20          | 0.16                                              | 0.96           | 0.99 | 1151                | 1.03               | 0.81                  |
| HLA-DQB*0301              | 0.15                            | 0.15          | 0.17                                              | 1              | 1    |                     | Low call rate <90% |                       |
| HLA-DQB*0302              | 0.12                            | 0.13          | 0.14                                              | 1              | 1    | 1071                | 0.94               | 0.66                  |
| HLA-DQB*0305              | 0.06                            | 0.06          | 0.006                                             | 0.50           | 1    | 1167                | 0.93               | 0.68                  |
| HLA-DQB*0501              | 0.17                            | 0.11          | 0.09                                              | 1              | 1    | 1170                | 1.65               | 7.06E-05 <sup>a</sup> |
| HLA-DQB*0503              | 0.008                           | 0.02          | 0.04                                              | 1              | 1    | 1142                | 0.47               | 0.08                  |
| HLA-DQB*0602              | 0.11                            | 0.14          | 0.20                                              | 0.97           | 0.99 | 1159                | 0.76               | 0.04                  |
| HLA-DQB*0603              | 0.06                            | 0.12          | 0.05                                              | 1              | 1    |                     | Low call rate <90% |                       |
| HLA-DQB*0604              | 0.007                           | 0.017         | 0.02                                              | 1              | 1    | 1080                | 0.46               | 0.10                  |
| HLA-DRB*0101 <sup>b</sup> | 0.18                            | 0.11          | 0.09                                              | 1              | 1    | 1154                | 1.66               | 6.05E-05 <sup>a</sup> |
| HLA-DRB*0301              | 0.12                            | 0.14          | 0.09                                              | 0.87           | 0.99 | 1167                | 0.85               | 0.22                  |
| HLA-DRB*0401              | 0.16                            | 0.13          | 0.09                                              | 0.74           | 1    | 1154                | 1.25               | 0.08                  |
| HLA-DRB*0402              | 0.001                           | 0.003         | 0.006                                             | 0.50           | 1    |                     | Low frequency <1%  |                       |
| HLA-DRB*0403              | 0.01                            | 0.006         | 0.02                                              | 1              | 1    |                     | Low call rate <90% |                       |
| HLA-DRB*0405              | 0.007                           | 0.01          | 0.006                                             | 0.50           | 0.99 | 1166                | 0.69               | 0.48                  |
| HLA-DRB*0407              | 0.018                           | 0.015         | 0.01                                              | 1              | 1    | 1090                | 1.14               | 0.71                  |
| HLA-DRB*1104              | 0.001                           | 0.004         | 0.006                                             | 0.50           | 1    |                     | Low frequency <1%  |                       |
| HLA-DRB*1301 <sup>b</sup> | 0.04                            | 0.07          | 0.04                                              | 0.88           | 1    | 1159                | 0.59               | 0.01                  |
| HLA-DRB*1302 <sup>b</sup> | 0.03                            | 0.04          | 0.02                                              | 1              | 1    | 1132                | 0.61               | 0.06                  |
| HLA-DRB*1303 <sup>b</sup> | 0.009                           | 0.007         | 0.01                                              | 1              | 1    | 1098                | 1.23               | 0.69                  |
| HLA-DRB*1401              | NA                              | 0.01          | 0.03                                              | 1              | 1    |                     | Low call rate <90% |                       |
| HLA-DRB*1404              | NA                              | 0.007         | 0.006                                             | 0.50           | 1    |                     | Low call rate <90% |                       |
| HLA-DRB*1501              | 0.11                            | 0.14          | 0.20                                              | 0.97           | 0.99 | 1159                | 0.76               | 0.04                  |

<sup>a</sup>Significant association observed at HLA class II alleles tagged by rs10484561, reported in Conde et. al. 2010 Nat Gen [1]

<sup>b</sup> Previously reported to be associated with FL in Wang et. al. 2010 Blood [4]

<sup>c</sup>Source: Supplementary Table 3 of deBakker et. al. 2006 Nat Gen [3]

SCALE: Scandinavian lymphoma etiology, GWAS: genome-side association study
