# Supplementary material for: GWAS of Follicular Lymphoma Reveals Allelic Heterogeneity at 6p21.32 and Suggests Shared Genetic Susceptibility with Diffuse Large B-cell Lymphoma
Source: PLoS Genet. 2011 Apr 21;7(4):e1001378. doi: 10.1371/journal.pgen.1001378 (PMC3080853; doi:10.1371/journal.pgen.1001378)
Supplement: Table S9 — Associations with risk of follicular lymphoma for haplotypes phased with 14 SNPs or 7 SNPs based on genotyped SNPs in Stage 1. (0.01 MB PDF) [file pgen.1001378.s015.pdf]

**Table S9. Associations with risk of follicular lymphoma for haplotypes phased with 14 SNPs or 7 SNPs based on genotyped SNPs in Stage 1**

Haplotypes (minor allele frequency > 1%) were phased<sup>[2]</sup> with A) 14 SNPs rs5000634, rs6457617, rs2647012, rs9357152, rs10484561, rs9275312, rs1794282, rs9275390, rs2647050, rs2856718, rs2856705, rs9275572, rs7745656, rs2858331 or B) 7 SNPs (rs5000634, rs6457617, rs2647012, rs9357152, rs10484561, rs9275312, rs1794282). Each haplotype was tested for association using a logistic regression test. The derived alleles for rs2647012 and rs10484561 are indicated respectively, in blue and red. SNPs are located from chr6:32771542 (51.26 cM) to 32789255 (51.29 cM), between *HLA-DQB1* and *HLA-DQA2*.

**A) 14 SNPs with recombination**

| Hap | HAPLOTYPE               | Freq cases | Freq controls | OR (95% CI)      | P        |
|-----|-------------------------|------------|---------------|------------------|----------|
| H1  | GTCGTA <b>C</b> TCTCGTG | 0.119      | 0.118         | 1.01 (0.77-1.31) | 0.97     |
| H2  | GTCGTA <b>C</b> TCTCGGA | 0.092      | 0.077         | 1.22 (0.89-1.65) | 0.21     |
| H3  | GTCATGCCTCCGGA          | 0.148      | 0.137         | 1.09 (0.86-1.40) | 0.47     |
| H4  | AC <b>T</b> ATACTTCCAGA | 0.210      | 0.303         | 0.61 (0.49-0.75) | 2.64E-06 |
| H5  | AC <b>T</b> ATATTTCCAGA | 0.106      | 0.130         | 0.80 (0.61-1.04) | 0.10     |
| H6  | GTCATGCCTCCAGA          | 0.047      | 0.045         | 1.06 (0.70-1.60) | 0.78     |
| H7  | ATCA <b>G</b> ACCTCCGGG | 0.174      | 0.114         | 1.65 (1.21-2.11) | 7.06E-05 |
| H8  | ACCATACTCTTGTG          | 0.091      | 0.068         | 1.36 (0.99-1.86) | 0.05     |

**B) 7 SNPs, without recombination**

| Hap | HAPLOTYPE        | Freq cases | Freq controls | OR (95% CI)      | P        |
|-----|------------------|------------|---------------|------------------|----------|
| H1  | GTCGTAC          | 0.214      | 0.195         | 1.12 (0.90-1.38) | 0.30     |
| H2  | AC <b>T</b> ATAC | 0.210      | 0.306         | 0.61 (0.49-0.74) | 1.73E-06 |
| H3  | GTCATGC          | 0.194      | 0.181         | 1.09 (0.87-1.35) | 0.47     |
| H4  | AC <b>T</b> ATAT | 0.106      | 0.130         | 0.80 (0.61-1.04) | 0.10     |
| H5  | ATCA <b>G</b> AC | 0.176      | 0.114         | 1.66 (1.30-2.12) | 5.33E-05 |
| H6  | ACCATAC          | 0.091      | 0.068         | 1.36 (0.99-1.86) | 0.05     |

OR: odds ratio, CI: confidence interval
