# Supplementary material for: GWAS of Follicular Lymphoma Reveals Allelic Heterogeneity at 6p21.32 and Suggests Shared Genetic Susceptibility with Diffuse Large B-cell Lymphoma
Source: PLoS Genet. 2011 Apr 21;7(4):e1001378. doi: 10.1371/journal.pgen.1001378 (PMC3080853; doi:10.1371/journal.pgen.1001378)
Supplement: Table S11 — Trend p-value of associations of age and sex with main genotypes among controls subjects per study. (0.02 MB PDF) [file pgen.1001378.s017.pdf]

**Table S11.** Trend p-value of associations of age ( $\leq 60$  years of age versus  $>60$  years) and sex (male versus female) with main genotypes among controls subjects per study (individual-level data on age and sex were not available for the Yale study or the SF1 study with regard to rs6536942, rs441890 and rs716183)

|                  | Age ( $\leq 60$ vs $>60$ ) |      |      |          |      |      | Sex (male vs female) |      |      |          |      |      |
|------------------|----------------------------|------|------|----------|------|------|----------------------|------|------|----------|------|------|
|                  | SCALE1                     | SF   | BC   | NCI-SEER | NSW  | Mayo | SCALE1               | SF   | BC   | NCI-SEER | NSW  | Mayo |
| <b>rs2647012</b> |                            |      |      |          |      |      |                      |      |      |          |      |      |
| chr6:32772436    | 0.96                       | 0.16 | 0.93 | 0.13     | 0.59 | 0.55 | 0.74                 | 0.89 | 0.81 | 0.80     | 0.22 | 0.91 |
| <i>HLA-DQB1</i>  |                            |      |      |          |      |      |                      |      |      |          |      |      |
| <b>rs6536942</b> |                            |      |      |          |      |      |                      |      |      |          |      |      |
| chr4:167205644   | 0.34                       | -    | 0.54 | 0.29     | 0.15 | 0.27 | 0.19                 | -    | 0.22 | 0.22     | 0.50 | 0.61 |
| <i>TLL1</i>      |                            |      |      |          |      |      |                      |      |      |          |      |      |
| <b>rs9275574</b> |                            |      |      |          |      |      |                      |      |      |          |      |      |
| chr6:33163516    | 0.03                       | 0.84 | 0.95 | 0.46     | 0.76 | 0.53 | 0.55                 | 0.38 | 0.75 | 0.84     | 0.07 | 0.05 |
| <i>HLA-DPB1</i>  |                            |      |      |          |      |      |                      |      |      |          |      |      |
| <b>rs441890</b>  |                            |      |      |          |      |      |                      |      |      |          |      |      |
| chr8:71727221    | 0.37                       | -    | 0.47 | 0.46     | 0.56 | 0.35 | 0.09                 | -    | 0.91 | 0.21     | 0.71 | 0.69 |
| <i>LACTB2</i>    |                            |      |      |          |      |      |                      |      |      |          |      |      |
| <b>rs716183</b>  |                            |      |      |          |      |      |                      |      |      |          |      |      |
| chr10:118894485  | 0.85                       | -    | 0.77 | 0.03     | 0.93 | 0.43 | 0.61                 | -    | 0.20 | 0.97     | 0.13 | 0.89 |
| <i>VAX1</i>      |                            |      |      |          |      |      |                      |      |      |          |      |      |

SCALE: Scandinavian lymphoma etiology, SF: San Francisco, BC: British Columbia, NCI-SEER: National Cancer Institute-Surveillance, Epidemiology and End Results, NSW: New South Wales, Yale: Yale University, Mayo: Mayo Clinic.
